# Supplementary material
Source: PubMed Central journal article supplement (PMC5934316)
Supplement: NIHMS921910-supplement-1.pdf [file NIHMS921910-supplement-1.pdf]

## Supplemental Method

Compound **1**:  $^1\text{H}$  NMR (600 MHz,  $\text{CDCl}_3$ )  $\delta$  7.59 (d, 1H,  $J = 8.2$  Hz, Ar-H), 7.30 (d, 1H,  $J = 8.2$  Hz, Ar-H), 7.20 (d, 1H,  $J = 8.2$  Hz, Ar-H), 7.10 (d, 1H,  $J = 8.2$  Hz, Ar-H), 7.07 (s, 1H, Ar-H), 4.10 (q, 2H,  $J = 7.3$  Hz,  $-\text{CH}_2\text{-CH}_3$ ), 3.77 (s, 2H,  $-\text{CH}_2\text{-CO}_2\text{H}$ ), 1.41 (t, 3H,  $J = 7.3$  Hz,  $-\text{CH}_2\text{-CH}_3$ );  $^{13}\text{C}$  NMR (150 MHz,  $\text{CDCl}_3$ )  $\delta$  178.6, 135.9, 127.6, 126.1, 121.7, 119.2, 119.0, 109.4, 106.0, 40.8, 31.1, 15.4; ESIMS  $m/z$  202.1  $[\text{M} - \text{H}]^-$ .

Compound **2a**:  $^1\text{H}$  NMR (600 MHz,  $\text{CDCl}_3$ )  $\delta$  7.65 (d, 1H,  $J = 7.8$  Hz, Ar-H), 7.30 (d, 1H,  $J = 7.8$  Hz, Ar-H), 7.25 (t, 1H,  $J = 7.8$  Hz, Ar-H), 7.15 (t, 1H,  $J = 6.8$  Hz, Ar-H), 7.13 (d, 1H,  $J = 3.2$  Hz, Ar-H), 6.55 (d, 1H,  $J = 3.2$ , Ar-H), 4.42 (t, 2H,  $J = 6.9$  Hz, indole- $\text{CH}_2\text{-}$ ), 2.78 (t, 2H,  $J = 6.9$  Hz,  $-\text{CH}_2\text{-CN}$ );  $^{13}\text{C}$  NMR (150 MHz,  $\text{CDCl}_3$ )  $\delta$  135.4, 129.1, 127.5, 122.3, 121.6, 120.2, 117.4, 108.7, 103.0, 42.2, 19.2.

Compound **2b**:  $^1\text{H}$  NMR (600 MHz,  $\text{CDCl}_3$ )  $\delta$  7.84 (s, 1H, Ar-H), 7.66 (s, 1H, Ar-H), 7.35 (d, 1H,  $J = 8.3$  Hz, Ar-H), 7.34 (d, 1H,  $J = 8.3$  Hz, Ar-H), 7.22 (dt, 1H,  $J = 7.3$  Hz, 1.0 Hz, Ar-H), 7.16 (dt, 1H,  $J = 7.5$  Hz, 1.4 Hz, Ar-H), 7.11 (d, 1H,  $J = 7.8$  Hz, Ar-H), 6.90 (dt, 1H,  $J = 7.8$  Hz, 1.0 Hz, Ar-H), 6.89 (d, 1H,  $J = 8.2$  Hz, Ar-H), 6.82 (dt, 1H,  $J = 7.3$  Hz, 1.0 Hz, Ar-H), 4.47 (t, 2H,  $J = 6.9$  Hz, indole- $\text{CH}_2\text{-CH}_2\text{-}$ ), 4.23 (q, 2H,  $J = 7.3$  Hz, indole- $\text{CH}_2\text{-CH}_3$ ), 2.85 (t, 2H,  $J = 6.9$  Hz,  $-\text{CH}_2\text{-CH}_2\text{-CN}$ ), 1.51 (t, 3H,  $J = 7.3$  Hz,  $-\text{CH}_2\text{-CH}_3$ );  $^{13}\text{C}$  NMR (150 MHz,  $\text{CDCl}_3$ )  $\delta$  166.7, 166.6, 136.2, 135.5, 132.8, 131.5, 129.6, 126.2, 126.0, 125.6, 123.4, 122.9, 122.8, 122.5, 121.3, 120.8, 116.5, 110.0, 109.1, 106.7, 105.0, 42.4, 41.7, 19.0, 15.1; ESIMS  $m/z$  410.2  $[\text{M} + \text{H}]^+$ .

Compound **3a**:  $^1\text{H}$  NMR (600 MHz,  $\text{CDCl}_3$ )  $\delta$  7.70 (d, 1H,  $J = 7.7$  Hz, Ar-H), 7.38 (d, 1H,  $J = 8.3$  Hz, Ar-H), 7.29 (t, 1H,  $J = 7.7$  Hz, Ar-H), 7.19 (t, 1H,  $J = 7.4$  Hz, Ar-H), 7.12 (d, 1H,  $J = 3.3$  Hz, Ar-H), 6.58 (d, 1H,  $J = 3.3$  Hz, Ar-H), 4.28 (t, 2H,  $J = 6.6$  Hz, indole- $\text{CH}_2\text{-CH}_2\text{-}$ ), 2.19 (t, 2H,  $J = 5.5$  Hz,  $-\text{CH}_2\text{-CN}$ ), 2.15 (m, 2H,  $-\text{CH}_2\text{-CH}_2\text{-CH}_2\text{-}$ );  $^{13}\text{C}$  NMR (150 MHz,  $\text{CDCl}_3$ )  $\delta$  135.9, 128.9, 127.8, 122.1, 121.4, 119.9, 119.0, 109.3, 102.2, 44.5, 26.1, 14.7; ESIMS  $m/z$  185.1  $[\text{M} + \text{H}]^+$ .

Compound **3b**:  $^1\text{H}$  NMR (600 MHz,  $\text{DMSO-}d_6$ )  $\delta$  7.89 (s, 1H, Ar-H), 7.88 (s, 1H, Ar-H), 7.57 (d, 1H,  $J = 8.8$  Hz, Ar-H), 7.54 (d, 1H,  $J = 8.2$  Hz, Ar-H), 7.14 (t, 1H,  $J = 8.2$  Hz, Ar-H), 7.12 (t, 1H,  $J = 7.7$  Hz, Ar-H), 6.94 (d, 1H,  $J = 8.3$  Hz, Ar-H), 6.91 (d, 1H,  $J = 8.3$  Hz, Ar-H), 6.80 (t, 1H,  $J = 7.1$  Hz, Ar-H), 6.79 (t, 1H,  $J = 7.1$  Hz, Ar-H), 4.33 (t, 2H,  $J = 7.1$  Hz, indole- $\text{CH}_2\text{-CH}_2\text{-}$ ), 4.26 (q, 2H,  $J = 7.1$  Hz, indole- $\text{CH}_2\text{-CH}_3$ ), 2.44 (t, 2H,  $J = 7.4$  Hz,  $-\text{CH}_2\text{-CN}$ ), 2.06 (m, 2H, indole- $\text{CH}_2\text{-CH}_2\text{-CH}_2\text{-}$ ), 1.32 (t, 3H,  $J = 7.1$  Hz, indole- $\text{CH}_2\text{-CH}_3$ );  $^{13}\text{C}$  NMR (150 MHz,  $\text{DMSO-}d_6$ )  $\delta$  166.9, 166.9, 136.6, 136.3, 133.6, 133.5, 128.8, 127.8, 125.8, 125.7, 122.9, 122.8, 122.3, 122.2, 120.8, 120.7, 120.4, 111.1, 111.0, 105.2, 104.7, 55.5, 40.4, 26.1, 15.7, 14.3; ESIMS  $m/z$  424.2  $[\text{M} + \text{H}]^+$ .

Compound **4a**:  $^1\text{H}$  NMR (600 MHz,  $\text{DMSO-}d_6$ )  $\delta$  7.68 (d, 1H,  $J = 8.0$  Hz, Ar-H), 7.35 (d, 1H,  $J = 8.4$  Hz, Ar-H), 7.26 (t, 1H,  $J = 7.7$  Hz, Ar-H), 7.16 (t, 1H,  $J = 7.3$  Hz, Ar-H), 7.12 (d, 1H,  $J = 2.7$  Hz, Ar-H), 6.58 (d, 1H,  $J = 2.7$  Hz, Ar-H), 4.17 (t, 2H,  $J = 6.8$  Hz, indole- $\text{CH}_2\text{-CH}_2\text{-}$ ), 2.26 (t, 2H,  $J = 7.3$  Hz,  $-\text{CH}_2\text{-CN}$ ), 1.98 (m, 2H, indole- $\text{CH}_2\text{-CH}_2\text{-}$ ), 1.61 (m, 2H,  $-\text{CH}_2\text{-CH}_2\text{-CN}$ );  $^{13}\text{C}$  NMR (150 MHz,  $\text{DMSO-}d_6$ )  $\delta$  136.0, 128.8, 127.7, 121.8, 121.3, 119.6, 119.4, 109.3, 101.7, 45.5, 29.4, 23.0, 17.0; ESIMS  $m/z$  199.1  $[\text{M} + \text{H}]^+$ .

Compound **4b**:  $^1\text{H}$  NMR (600 MHz, DMSO- $d_6$ )  $\delta$  7.91 (s, 1H, Ar-H), 7.90 (s, 1H, Ar-H), 7.56 (d, 1H,  $J = 8.3$  Hz, Ar-H), 7.53 (d, 1H,  $J = 8.7$  Hz, Ar-H), 7.11 (dt, 1H,  $J = 7.5$  Hz, 1.0 Hz, Ar-H), 7.10 (dt, 1H,  $J = 7.8$  Hz, 0.9 Hz, Ar-H), 6.88 (d, 1H,  $J = 8.3$  Hz, Ar-H), 6.86 (d, 1H,  $J = 8.7$  Hz, Ar-H), 6.76 (dt, 1H,  $J = 7.8$  Hz, 1.0 Hz, Ar-H), 6.75 (dt, 1H,  $J = 7.4$  Hz, 0.9 Hz, Ar-H), 4.30 (t, 2H,  $J = 6.9$  Hz, indole-CH $_2$ -CH $_2$ ), 4.28 (q, 2H,  $J = 7.3$  Hz, indole-CH $_2$ -CH $_3$ ), 2.51 (t, 2H,  $J = 7.3$  Hz, -CH $_2$ -CN), 1.83 (m, 2H, indole-CH $_2$ -CH $_2$ -), 1.50 (m, 2H, -CH $_2$ -CH $_2$ -CN), 1.34 (t, 3H,  $J = 7.3$  Hz, indole-CH $_2$ -CH $_3$ );  $^{13}\text{C}$  NMR(150 MHz, DMSO- $d_6$ )  $\delta$  166.9, 166.9, 136.5, 136.3, 133.7, 133.3, 128.5, 127.9, 125.9, 125.9, 122.8, 122.7, 122.1, 122.1, 121.0, 120.7, 120.6, 111.2, 111.1, 104.9, 104.8, 45.7, 41.5, 29.3, 22.7, 16.4, 15.7; ESIMS  $m/z$  438.1[M + H] $^+$ .

Compound **4c**:  $^1\text{H}$  NMR (600 MHz, DMSO- $d_6$ )  $\delta$  10.92 (s, 1H, imide-NH), 7.80 (s, 1H, Ar-H), 7.77 (s, 1H, Ar-H), 7.50 (d, 1H,  $J = 8.2$  Hz, Ar-H), 7.47 (d, 1H,  $J = 8.2$  Hz, Ar-H), 7.04 (dt, 1H,  $J = 7.4$  Hz, 0.9 Hz, Ar-H), 7.03 (dt, 1H,  $J = 7.8$  Hz, 1.0 Hz, Ar-H), 6.81 (d, 1H,  $J = 8.2$  Hz, Ar-H), 6.79 (d, 1H,  $J = 7.8$  Hz, Ar-H), 6.67 (dt, 1H,  $J = 7.4$  Hz, 0.9 Hz, Ar-H), 6.65 (dt, 1H,  $J = 7.8$  Hz, 1.0 Hz, Ar-H), 4.28 (t, 2H,  $J = 6.8$  Hz, indole-CH $_2$ -CH $_2$ -), 4.26 (q, 2H,  $J = 7.3$  Hz, indole-CH $_2$ -CH $_3$ ), 2.52 (t, 2H,  $J = 7.3$  Hz, -CH $_2$ -CN), 1.82 (m, 2H, indole-CH $_2$ -CH $_2$ -), 1.48 (m, 2H, -CH $_2$ -CH $_2$ -CN), 1.34 (t, 3H,  $J = 7.3$  Hz, -CH $_2$ -CH $_3$ );  $^{13}\text{C}$  NMR (150 MHz, DMSO- $d_6$ )  $\delta$  173.4, 173.4, 136.3, 136.0, 132.4, 132.0, 128.8, 128.2, 128.2, 127.7, 126.4, 122.3, 122.2, 121.8, 121.0, 120.1, 120.0, 110.8, 110.7, 105.6, 105.4, 45.5, 41.3, 29.3, 22.7, 16.4, 15.8; ESIMS  $m/z$  437.1 [M + H] $^+$ .

Compound **5a**:  $^1\text{H}$  NMR (600 MHz, CDCl $_3$ )  $\delta$  7.54 (d, 1H,  $J = 7.3$  Hz, Ar-H), 7.42 (d, 1H,  $J = 7.7$  Hz, Ar-H), 7.22 (s, 1H, Ar-H), 7.12 (t, 1H,  $J = 7.3$  Hz, Ar-H), 7.00 (1H, t,  $J = 7.3$  Hz, Ar-H), 4.17 (t, 2H,  $J = 6.9$  Hz, indole-CH $_2$ -), 3.53 (s, 2H, -CH $_2$ -CO $_2$ H), 2.43 (t, 2H,  $J = 6.9$  Hz, -CH $_2$ -CN), 2.02 (2H, m, indole-CH $_2$ -CH $_2$ -CN);  $^{13}\text{C}$  NMR(150 MHz, DMSO- $d_6$ )  $\delta$  175.0, 136.3, 128.6, 127.2, 121.6, 120.7, 119.9, 119.0, 110.4, 109.8, 44.5, 33.2, 26.4, 14.4; ESI-MS  $m/z$  241.1 [M - H] $^-$ .

Compound **5b**:  $^1\text{H}$  NMR (600 MHz, DMSO- $d_6$ )  $\delta$  7.88 (s, 2H, Ar-H), 7.57 (d, 2H,  $J = 8.4$  Hz, Ar-H), 7.14 (dt, 2H,  $J = 7.8$  Hz, 0.9 Hz, Ar-H), 6.95 (d, 2H,  $J = 8.4$  Hz, Ar-H), 6.81 (dt, 2H,  $J = 7.8$  Hz, 0.9 Hz, Ar-H), 4.30 (t, 4H,  $J = 6.9$  Hz, indole-CH $_2$ -), 2.42 (t, 4H,  $J = 7.3$  Hz, -CH $_2$ -CN), 2.04 (m, 4H, -CH $_2$ -CH $_2$ -CN);  $^{13}\text{C}$  NMR(150 MHz, DMSO- $d_6$ )  $\delta$  166.8, 166.8, 136.6, 136.6, 133.7, 133.7, 128.5, 128.5, 125.7, 125.7, 123.0, 123.0, 122.2, 122.2, 120.8, 120.8, 120.4, 120.4, 111.1, 111.1, 105.1, 105.1, 45.3, 45.3, 26.1, 26.1, 14.3, 14.3; ESIMS  $m/z$  463.2 [M + H] $^+$ .

Compound **6a**:  $^1\text{H}$  NMR (600 MHz, CDCl $_3$ )  $\delta$  12.30 (s, 1H, -CO $_2$ H), 7.59 (d, 1H,  $J = 7.8$  Hz, Ar-H), 7.45 (d, 1H,  $J = 8.2$  Hz, Ar-H), 7.27 (s, 1H, Ar-H), 7.18 (dt, 1H,  $J = 7.8$  Hz, 0.9 Hz, Ar-H), 7.08 (dt, 1H,  $J = 7.8$  Hz, 0.9 Hz, Ar-H), 4.13 (t, 2H,  $J = 6.9$  Hz, indole-CH $_2$ -), 3.72 (s, 2H, -CH $_2$ -CO $_2$ H), 2.44 (t, 2H,  $J = 6.9$  Hz, indole-CH $_2$ -CN), 1.80 (m, 2H, N-CH $_2$ -CH $_2$ -), 1.50 (m, 2H, -CH $_2$ -CH $_2$ -CN);  $^{13}\text{C}$  NMR (150 MHz, DMSO- $d_6$ )  $\delta$  173.7, 136.4, 128.2, 127.7, 121.8, 121.0, 119.6, 119.2, 110.2, 107.9, 45.1, 31.4, 29.6, 22.8, 16.3; ESI-MS  $m/z$  255.1 [M - H] $^-$ .

Compound **6b**:  $^1\text{H}$  NMR (600 MHz, DMSO- $d_6$ )  $\delta$  7.93 (s, 2H, Ar-H), 7.55 (d, 2H,  $J = 8.3$  Hz, Ar-H), 7.09 (t, 2H,  $J = 7.3$  Hz, Ar-H), 6.83 (d, 2H,  $J = 8.3$  Hz, Ar-H), 6.73 (2H, t,  $J = 7.4$  Hz, Ar-H), 4.32 (t, 4H,  $J = 6.9$  Hz, indole-CH $_2$ -), 2.52 (t, 4H,  $J = 7.3$  Hz, -CH $_2$ -CN), 1.84 (m, 4H, N-CH $_2$ -CH $_2$ -), 1.50 (m, 4H, -CH $_2$ -CH $_2$ -CN);  $^{13}\text{C}$  NMR(150 MHz, DMSO- $d_6$ )  $\delta$  166.9, 166.9, 136.4, 136.4, 133.6, 133.6, 128.3, 128.3, 126.0, 126.0, 122.8, 122.8, 121.9, 121.9, 121.0, 121.0, 120.6,

120.6, 111.2, 111.2, 104.9, 104.9, 45.7, 45.7, 29.3, 29.3, 22.7, 22.7, 16.4, 16.4; ESIMS  $m/z$  491.2  $[M + H]^+$ .

Compound **7a**:  $^1H$  NMR (600 MHz,  $CDCl_3$ )  $\delta$  7.76 (d, 1H,  $J = 7.7$  Hz, Ar-H), 7.38–7.33 (m, 4H, Ar-H), 7.27 (dt, 1H,  $J = 6.8$  Hz, 0.9 Hz, Ar-H), 7.22 (dt, 1H,  $J = 6.9$  Hz, 0.9 Hz, Ar-H), 7.20 (t, 1H,  $J = 3.2$  Hz, Ar-H), 7.18 (d, 2H,  $J = 6.8$  Hz, Ar-H), 6.65 (dd, 1H,  $J = 3.2$  Hz, 0.9 Hz, Ar-H), 5.37 (s, 2H,  $-CH_2-Ph$ );  $^{13}C$  NMR (150 MHz,  $CDCl_3$ )  $\delta$  137.7, 136.5, 128.9, 128.9, 128.4, 127.8, 127.0, 126.9, 121.9, 121.2, 119.7, 119.7, 109.9, 101.9, 50.2; ESIMS  $m/z$  208.2  $[M + H]^+$ .

Compound **7b**:  $^1H$  NMR (600 MHz,  $DMSO-d_6$ )  $\delta$  8.02 (s, 1H, Ar-H), 7.94 (s, 1H, Ar-H), 7.53 (d, 1H,  $J = 7.3$  Hz, Ar-H), 7.44 (d, 1H,  $J = 7.8$  Hz, Ar-H), 7.33 (t, 2H,  $J = 6.4$  Hz, Ar-H), 7.27 (t, 1H,  $J = 6.8$  Hz, Ar-H), 7.20 (d, 2H,  $J = 5.9$  Hz, Ar-H), 7.11 (t, 1H,  $J = 7.3$  Hz, Ar-H), 7.05 (t, 1H,  $J = 6.8$  Hz, Ar-H), 6.91 (d, 1H,  $J = 7.3$  Hz, Ar-H), 6.88 (d, 1H,  $J = 7.3$  Hz, Ar-H), 6.75 (t, 1H,  $J = 7.3$  Hz, Ar-H), 6.73 (t, 1H,  $J = 7.3$  Hz, Ar-H), 5.52 (s, 2H,  $-CH_2-Ph$ ), 4.29 (q, 2H,  $J = 6.4$  Hz,  $-CH_2-CH_3$ ), 1.34 (t, 3H,  $J = 6.8$  Hz,  $-CH_2-CH_3$ );  $^{13}C$  NMR (150 MHz,  $DMSO-d_6$ )  $\delta$  167.0, 166.9, 137.9, 136.6, 136.3, 133.9, 133.3, 129.2, 129.2, 128.8, 128.1, 127.8, 127.6, 127.6, 126.2, 125.9, 122.9, 122.8, 122.2, 122.0, 120.8, 120.7, 111.5, 111.1, 105.3, 104.7, 50.0, 40.5, 15.7; ESIMS  $m/z$  447.2  $[M + H]^+$ .

Compound **7c**:  $^1H$  NMR (600 MHz,  $DMSO-d_6$ )  $\delta$  10.95 (s, 1H, imide-NH), 7.90 (s, 1H, Ar-H), 7.83 (s, 1H, Ar-H), 7.46 (d, 1H,  $J = 8.2$  Hz, Ar-H), 7.36 (d, 1H,  $J = 8.2$  Hz, Ar-H), 7.32 (t, 2H,  $J = 7.6$  Hz, Ar-H), 7.26 (t, 1H,  $J = 7.3$  Hz, Ar-H), 7.17 (d, 2H,  $J = 7.3$  Hz, Ar-H), 7.04 (t, 1H,  $J = 7.8$  Hz, Ar-H), 6.97 (t, 1H,  $J = 7.3$  Hz, Ar-H), 6.84 (d, 1H,  $J = 8.2$  Hz, Ar-H), 6.82 (d, 1H,  $J = 7.7$  Hz, Ar-H), 6.65 (t, 1H,  $J = 7.8$  Hz, Ar-H), 6.64 (t, 1H,  $J = 7.4$  Hz, Ar-H), 5.49 (s, 2H,  $-CH_2-Ph$ ), 4.26 (q, 2H,  $J = 7.3$  Hz,  $-CH_2-CH_3$ ), 1.34 (t, 3H,  $J = 7.3$  Hz,  $-CH_2-CH_3$ );  $^{13}C$  NMR (150 MHz,  $DMSO-d_6$ )  $\delta$  173.4, 173.4, 138.2, 136.4, 136.0, 132.8, 132.0, 129.1, 129.1, 128.5, 128.0, 127.5, 127.4, 127.4, 126.7, 126.4, 122.4, 122.2, 121.8, 121.7, 120.2, 120.1, 111.1, 110.7, 106.0, 105.4, 49.9, 41.3, 15.8; ESIMS  $m/z$  446.2  $[M + H]^+$ .

Compound **7d**:  $^1H$  NMR (600 MHz,  $DMSO-d_6$ )  $\delta$  11.66 (s, 1H, indole-NH), 10.90 (s, 1H, imide-NH), 7.76 (s, 1H, Ar-H), 7.72 (s, 1H, Ar-H), 7.46 (d, 1H,  $J = 8.2$  Hz, Ar-H), 7.37 (d, 1H,  $J = 8.1$  Hz, Ar-H), 7.04 (t, 1H,  $J = 7.6$  Hz, Ar-H), 6.98 (t, 1H,  $J = 7.5$  Hz, Ar-H), 6.90 (d, 1H,  $J = 8.0$  Hz, Ar-H), 6.74 (d, 1H,  $J = 8.1$  Hz, Ar-H), 6.69 (t, 1H,  $J = 7.5$  Hz, Ar-H), 6.62 (t, 1H,  $J = 7.5$  Hz, Ar-H), 4.24 (q, 2H,  $J = 7.1$  Hz,  $-CH_2-CH_3$ ), 1.31 (t, 3H,  $J = 7.2$  Hz,  $-CH_2-CH_3$ );  $^{13}C$  NMR (150 MHz,  $DMSO-d_6$ )  $\delta$  173.6, 173.5, 136.6, 136.0, 131.9, 129.8, 128.4, 127.7, 126.6, 125.7, 122.2, 122.1, 121.9, 121.6, 120.1, 119.9, 112.3, 110.6, 106.1, 105.5, 41.2, 15.8; HRESIMS  $m/z$  356.1404  $[M + H]^+$  (calcd. for  $C_{22}H_{18}N_3O_2$ , 356.1399).

**BMA016**:  $^1H$  NMR (600 MHz,  $CDCl_3$ )  $\delta$  7.75 (s, 1H, Ar-H), 7.58 (s, 1H, Ar-H), 7.51 (s, 1H, imide-NH), 7.31 (d, 1H,  $J = 8.2$  Hz, Ar-H), 7.29 (d, 1H,  $J = 8.2$  Hz, Ar-H), 7.16 (t, 1H,  $J = 7.3$  Hz, Ar-H), 7.11 (t, 1H,  $J = 8.2$  Hz, Ar-H), 7.09 (d, 1H,  $J = 8.2$  Hz, Ar-H), 6.88 (d, 1H,  $J = 8.2$  Hz, Ar-H), 6.85 (t, 1H,  $J = 7.4$  Hz, Ar-H), 6.77 (t, 1H,  $J = 7.3$  Hz, Ar-H), 4.45 (t, 2H,  $J = 6.9$  Hz, indole- $CH_2-CH_2-$ ), 4.20 (q, 2H,  $J = 7.3$  Hz, indole- $CH_2-CH_3$ ), 2.80 (t, 2H,  $J = 6.9$  Hz,  $-CH_2-CH_2-CN$ ), 1.48 (t, 3H,  $J = 7.3$  Hz,  $-CH_2-CH_3$ );  $^{13}C$  NMR (150 MHz,  $CDCl_3$ )  $\delta$  171.8, 171.8, 136.0, 135.4, 131.7, 130.6, 129.5, 126.6, 126.3, 125.9, 123.0, 122.7, 122.3, 122.2, 120.8, 120.2, 116.7,

109.6, 108.8, 107.3, 105.4, 42.3, 41.5, 19.0, 15.3; HRESIMS  $m/z$  407.1493 [M – H]<sup>–</sup> (calcd. for C<sub>24</sub>H<sub>20</sub>N<sub>4</sub>O<sub>2</sub>, 407.1508).

**BMA019:** <sup>1</sup>H NMR (500 MHz, DMSO-*d*<sub>6</sub>) δ 10.94 (s, 1H, imide-NH), 7.78 (s, 1H, Ar-H), 7.74 (s, 1H, Ar-H), 7.50 (d, 1H, *J* = 8.3 Hz, Ar-H), 7.47 (d, 1H, *J* = 8.3 Hz, Ar-H), 7.07 (dt, 1H, *J* = 7.1 Hz, 1.1 Hz, Ar-H), 7.05 (dt, 1H, *J* = 7.1 Hz, 1.1 Hz, Ar-H), 6.86 (d, 1H, *J* = 7.7 Hz, Ar-H), 6.85 (d, 1H, *J* = 7.7 Hz, Ar-H), 6.71 (t, 1H, *J* = 7.7 Hz, Ar-H), 6.69 (t, 1H, *J* = 7.1 Hz, Ar-H), 4.29 (t, 2H, *J* = 6.6 Hz, indole-CH<sub>2</sub>-CH<sub>2</sub>-), 4.24 (q, 2H, *J* = 7.2 Hz, indole-CH<sub>2</sub>-CH<sub>3</sub>), 2.40 (t, 2H, *J* = 7.1 Hz, -CH<sub>2</sub>-CN), 2.01 (m, 2H, indole-CH<sub>2</sub>-CH<sub>2</sub>-), 1.30 (t, 3H, *J* = 7.2 Hz, -CH<sub>2</sub>-CH<sub>3</sub>); <sup>13</sup>C NMR (125 MHz, DMSO-*d*<sub>6</sub>) δ 173.4, 173.4, 136.4, 136.1, 132.4, 132.2, 128.5, 127.6, 126.3, 126.2, 122.4, 122.3, 122.0, 121.9, 120.5, 120.3, 120.0, 110.7, 110.6, 105.9, 105.3, 45.0, 41.2, 26.2, 15.8, 14.3; HRESIMS  $m/z$  421.1645 [M – H]<sup>–</sup> (calcd. for C<sub>26</sub>H<sub>21</sub>N<sub>4</sub>O<sub>2</sub>, 421.1665).

**BMA088:** <sup>1</sup>H NMR(600 MHz, CDCl<sub>3</sub>) δ 7.70 (s, 1H, Ar-H), 7.55 (s, 1H, Ar-H), 7.32 (d, 1H, *J* = 8.2 Hz, Ar-H), 7.27 (d, 1H, *J* = 8.3 Hz, Ar-H), 7.13 (dt, 1H, *J* = 7.8 Hz, 1.0 Hz, Ar-H), 7.11 (dt, 1H, *J* = 7.8 Hz, 1.0 Hz, Ar-H), 7.06 (d, 1H, *J* = 7.8 Hz, Ar-H), 6.91 (d, 1H, *J* = 7.8 Hz, Ar-H), 6.81 (dt, 1H, *J* = 7.8 Hz, 0.9 Hz, Ar-H), 6.74 (dt, 1H, *J* = 7.8 Hz, 0.9 Hz, Ar-H), 5.25 (d, 2H, *J* = 7.8 Hz, imide-CH<sub>2</sub>-OH), 4.19 (q, 2H, *J* = 7.3 Hz, indole-CH<sub>2</sub>-CH<sub>3</sub>), 4.15 (t, 2H, *J* = 6.4 Hz, indole-CH<sub>2</sub>-CH<sub>2</sub>), 3.34 (t, 1H, *J* = 7.8 Hz, -OH), 2.27 (t, 2H, *J* = 6.8 Hz, -CH<sub>2</sub>-CN), 1.94 (m, 2H, indole-CH<sub>2</sub>-CH<sub>2</sub>-), 1.56 (m, 2H, CN-CH<sub>2</sub>-CH<sub>2</sub>-), 1.47 (t, 3H, *J* = 7.3 Hz, -CH<sub>2</sub>-CH<sub>3</sub>); <sup>13</sup>C NMR(150 MHz, CDCl<sub>3</sub>) δ 171.9, 171.9, 136.1, 136.1, 131.5, 131.5, 127.9, 126.7, 126.3, 126.0, 122.7, 122.6, 122.5, 122.3, 120.5, 120.2, 119.2, 109.7, 109.5, 106.2, 105.6, 61.8, 45.8, 41.6, 29.0, 22.8, 17.0, 15.2; HRESIMS  $m/z$  467.2088 [M + H]<sup>+</sup> (calcd. for C<sub>28</sub>H<sub>27</sub>N<sub>4</sub>O<sub>3</sub>, 467.2078).

**BMA097:** <sup>1</sup>H NMR (600 MHz, DMSO-*d*<sub>6</sub>) δ 10.98 (s, 1H, imide-NH), 7.76 (s, 2H, Ar-H), 7.50 (d, 2H, *J* = 8.2 Hz, Ar-H), 7.08 (dt, 2H, *J* = 7.8 Hz, 0.9 Hz, Ar-H), 6.90 (d, 2H, *J* = 8.2 Hz, Ar-H), 6.73 (dt, 2H, *J* = 7.4 Hz, 0.9 Hz, Ar-H), 4.28 (t, 4H, *J* = 6.9 Hz, indole-CH<sub>2</sub>-), 2.38 (4H, t, *J* = 7.3 Hz, -CH<sub>2</sub>-CN), 2.03 (m, 4H, -CH<sub>2</sub>-CH<sub>2</sub>-CN); <sup>13</sup>C NMR(150 MHz, DMSO-*d*<sub>6</sub>) δ 173.3, 173.3, 136.4, 136.4, 132.5, 132.5, 128.2, 128.2, 126.2, 126.2, 122.5, 122.5, 121.9, 121.9, 120.5, 120.5, 120.2, 120.2, 110.7, 110.7, 105.8, 105.8, 45.0, 45.0, 26.1, 26.1, 14.3, 14.3; HRESIMS  $m/z$  460.1769 [M – H]<sup>–</sup> (calcd. for C<sub>28</sub>H<sub>22</sub>N<sub>5</sub>O<sub>2</sub>, 460.1774).

**BMA100:** <sup>1</sup>H NMR (600 MHz, DMSO-*d*<sub>6</sub>) δ 10.93 (s, 1H, imide-NH), 7.80 (s, 2H, Ar-H), 7.48 (d, 2H, *J* = 8.2 Hz, Ar-H), 7.02 (dt, 2H, *J* = 7.8 Hz, 1.0 Hz, Ar-H), 6.77 (d, 2H, *J* = 8.2 Hz, Ar-H), 6.63 (dt, 2H, *J* = 7.4 Hz, 0.9 Hz, Ar-H), 4.29 (t, 4H, *J* = 6.9 Hz, indole-CH<sub>2</sub>-), 2.51 (t, 4H, *J* = 7.3 Hz, -CH<sub>2</sub>-CN), 1.83 (m, 4H, N-CH<sub>2</sub>-CH<sub>2</sub>-), 1.48 (m, 4H, -CH<sub>2</sub>-CH<sub>2</sub>-CN); <sup>13</sup>C NMR(150 MHz, DMSO-*d*<sub>6</sub>) δ 173.4, 173.4, 136.3, 136.3, 132.4, 132.4, 128.0, 128.0, 126.5, 126.5, 122.3, 122.3, 121.6, 121.6, 121.0, 121.0, 120.0, 120.0, 110.8, 110.8, 105.6, 105.6, 45.5, 45.5, 29.3, 29.3, 22.7, 22.7, 16.3, 16.3; HRESIMS  $m/z$  488.2108 [M – H]<sup>–</sup> (calcd. for C<sub>30</sub>H<sub>26</sub>N<sub>5</sub>O<sub>2</sub>, 488.2092).  
Compound **7c**: <sup>1</sup>H NMR (600 MHz, DMSO-*d*<sub>6</sub>) δ 10.95 (s, 1H, imide-NH), 7.90 (s, 1H, Ar-H), 7.83 (s, 1H, Ar-H), 7.46 (d, 1H, *J* = 8.2 Hz, Ar-H), 7.36 (d, 1H, *J* = 8.2 Hz, Ar-H), 7.32 (t, 2H, *J* = 7.6 Hz, Ar-H), 7.26 (t, 1H, *J* = 7.3 Hz, Ar-H), 7.17 (d, 2H, *J* = 7.3 Hz, Ar-H), 7.04 (t, 1H, *J* = 7.8 Hz, Ar-H), 6.97 (t, 1H, *J* = 7.3 Hz, Ar-H), 6.84 (d, 1H, *J* = 8.2 Hz, Ar-H), 6.82 (d, 1H, *J* = 7.7 Hz, Ar-H), 6.65 (t, 1H, *J* = 7.8 Hz, Ar-H), 6.64 (t, 1H, *J* = 7.4 Hz, Ar-H), 5.49 (s, 2H, -CH<sub>2</sub>-Ph), 4.26 (q, 2H, *J* = 7.3 Hz, -CH<sub>2</sub>-CH<sub>3</sub>), 1.34 (t, 3H, *J* = 7.3 Hz, -CH<sub>2</sub>-CH<sub>3</sub>); <sup>13</sup>C NMR (150 MHz, DMSO-*d*<sub>6</sub>) δ 173.4, 173.4, 138.2, 136.4, 136.0, 132.8, 132.0, 129.1, 129.1, 128.5, 128.0, 127.5,

127.4, 127.4, 126.7, 126.4, 122.4, 122.2, 121.8, 121.7, 120.2, 120.1, 111.1, 110.7, 106.0, 105.4, 49.9, 41.3, 15.8; ESIMS  $m/z$  446.2 [M + H]<sup>+</sup>.

**BMA127:** <sup>1</sup>H NMR (600 MHz, DMSO-*d*<sub>6</sub>)  $\delta$  7.99 (s, 1H, Ar-H), 7.71 (s, 1H, Ar-H), 7.56 (d, 1H,  $J = 8.2$  Hz, Ar-H), 7.49 (d, 1H,  $J = 8.3$  Hz, Ar-H), 7.07 (dd, 1H,  $J = 7.7$  Hz, 1.1 Hz, Ar-H), 7.05 (dd, 1H,  $J = 7.8$  Hz, 1.5 Hz, Ar-H), 7.02 (d, 1H,  $J = 8.1$  Hz, Ar-H), 6.72 (t, 1H,  $J = 7.5$  Hz, Ar-H), 6.68 (t, 1H,  $J = 7.8$  Hz, Ar-H), 6.63 (t, 1H,  $J = 7.9$  Hz, Ar-H), 6.61 (t, 1H,  $J = 7.0$  Hz, indole-CH<sub>2</sub>-OH), 6.32 (t, 1H,  $J = 7.0$  Hz, imide-CH<sub>2</sub>-OH), 5.61 (s, 2H, indole-CH<sub>2</sub>-OH), 4.98 (s, 2H, imide-CH<sub>2</sub>-OH), 4.25 (q, 2H,  $J = 7.3$  Hz, -CH<sub>2</sub>-CH<sub>3</sub>), 1.28 (t, 3H,  $J = 7.3$  Hz, -CH<sub>2</sub>-CH<sub>3</sub>); <sup>13</sup>C NMR (150 MHz, DMSO-*d*<sub>6</sub>)  $\delta$  171.6, 171.6, 136.1, 136.0, 132.6, 132.1, 127.8, 127.4, 126.8, 126.4, 122.4, 122.4, 121.8, 120.5, 120.3, 111.4, 110.7, 105.7, 105.4, 69.7, 60.3, 41.3, 15.7; HRESIMS  $m/z$  416.1613 [M + H]<sup>+</sup> (calcd. for C<sub>24</sub>H<sub>22</sub>N<sub>3</sub>O<sub>4</sub>, 416.1610).
