# Supplementary material
Source: PubMed Central journal article supplement (PMC5934316)
Supplement: NIHMS921910-supplement-2.pdf [file NIHMS921910-supplement-2.pdf]

### Supplemental Figure

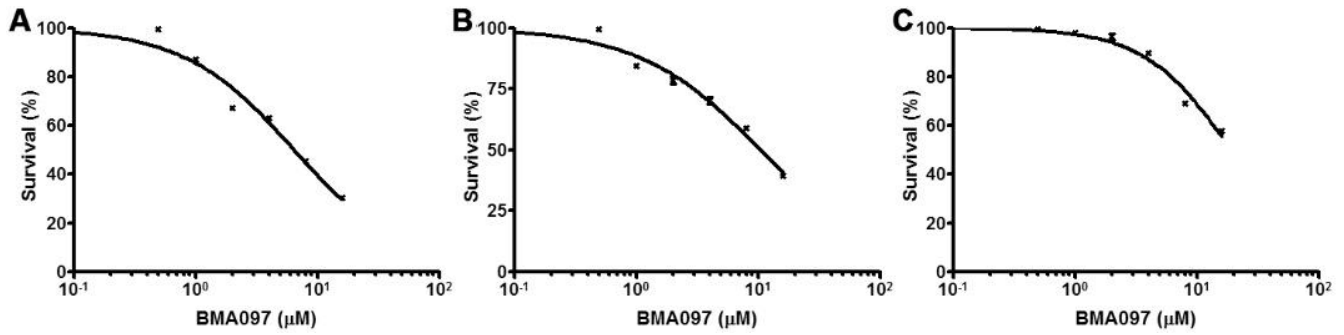

**Figure S1. BMA097 inhibition of MCF10A cell proliferation.** Non cancer human epithelial cell line MCF10A was treated with BMA097 at different concentrations for 72 (A), 48 (B), and 24 (C) hrs followed by MTT assay.
